# Supplementary material for: Investigation on the antidepressant effect of sea buckthorn seed oil through the GC-MS-based metabolomics approach coupled with multivariate analysis
Source: Royal Society of Chemistry journal article supplement (doi:10.1039/c5fo00695c), 2015-01-01
Supplement: c5fo00695c1.pdf [file c5fo00695c1.pdf]

## Investigation on the antidepressant effect of sea buckthorn seed oil through the GC-MS-based metabolomics approach coupled with multivariate analysis

Jun-sheng Tian<sup>a</sup>, Cai-chun Liu<sup>†a</sup>, Huan Xiang<sup>b</sup>, Xiao-fen Zheng<sup>a</sup>, Guo-jiang Peng<sup>a</sup>, Xiang Zhang<sup>c</sup>, Guan-hua Du<sup>\*\*d</sup>, and Xue-mei Qin<sup>\*a</sup>

<sup>a</sup> Modern Research Center for Traditional Chinese Medicine, Shanxi University, Taiyuan 030006, P. R. China

<sup>b</sup> Physical Education Department of Shanxi University, Taiyuan 030006, PR China

<sup>c</sup> The Center for Regulatory Environmental Analytical Metabolomics, University of Louisville, KY 40292, USA.

<sup>d</sup> Institute of Materia Medica, Chinese Academy of Medical Sciences & Peking Union Medical College, Beijing 100050, P. R. China

### SUPPLEMENTARY MATERIALS

Table S1 Endogenous metabolites in urine of rats detected by GC- MS.

|    | Retention time (min) | Metabolites                   | Ions (m/z)     |
|----|----------------------|-------------------------------|----------------|
| 1  | 6.82                 | Linolenic acid                | 73,95,112      |
| 2  | 6.89                 | Formic acid                   | 57,71          |
| 3  | 6.95                 | Malonic acid                  | 55,87,133      |
| 4  | 7.11                 | L-arginine                    | 77.107         |
| 5  | 7.40                 | Linoleic acid monoglyceride   | 73,129,147     |
| 6  | 7.58                 | Oxalic acid (allyl octyester) | 57,71,120      |
| 7  | 7.80                 | Orthophosphoric acid          | 81,99,127,155  |
| 8  | 8.79                 | Succinic acid                 | 66,73,101,129  |
| 9  | 8.87                 | Benzoic acid                  | 77,105,122,149 |
| 10 | 8.95                 | Maleic acid                   | 55,71,99,127   |
| 11 | 9.72                 | Glycine                       | 56,84,128      |
| 12 | 10.12                | Glutaric acid                 | 56,84,115      |
| 13 | 10.22                | Alphatoluic acid              | 65,91,136      |
| 14 | 10.53                | Malic acid                    | 71,89,117      |
| 15 | 10.62                | Alanine                       | 72,88,116      |
| 16 | 13.24                | Hexanedioic acid              | 83,111,128     |
| 17 | 13.40                | L-valine                      | 72,98,116,144  |
| 18 | 15.21                | L-leucine                     | 58,102,158     |
| 19 | 15.63                | L-isoleucine                  | 74,102,130,158 |
| 20 | 15.81                | Pimelic acid                  | 55,79,97,125   |
| 21 | 16.31                | L-proline                     | 70.100.128,156 |
| 22 | 17.13                | Cl-Phenylalanine              | 103,131,147    |

|    |       |                            |                   |
|----|-------|----------------------------|-------------------|
| 23 | 18.22 | 4-Methoxyphenylacetic acid | 77,91,121         |
| 24 | 18.41 | Suberic acid               | 69,97,115,143     |
| 25 | 19.62 | sumiki's acid              | 112,139,167       |
| 26 | 21.34 | Citrate                    | 129,157           |
| 27 | 22.61 | Cinnamic acid              | 91,131,147        |
| 28 | 23.26 | Isonipecotic acid          | 84,128,156,184    |
| 29 | 23.49 | Benzoyl-glycine            | 77,105,134,161    |
| 30 | 25.17 | Phenylalanine              | 103,148           |
| 31 | 25.77 | Phthalic acid              | 149,125           |
| 32 | 26.23 | Aminohippuric acid         | 77,91,120,148,194 |
| 33 | 26.37 | Indolepyruvate             | 130,157           |
| 34 | 27.61 | Acetyl citrate             | 83,101,129,157    |
| 35 | 32.88 | Stearic acid               | 55,87,129         |
| 36 | 34.08 | Palmitic acid              | 157,199,213,269   |
| 37 | 40.79 | Glycerol 1-hexadecanoate   | 83,98,239         |
| 38 | 44.51 | Glycerol 1-octadecanoate   | 83,98,267         |

---
